# Supplementary material
Source: PubMed Central journal article supplement (PMC3271128)
Supplement: NIHMS330327-supplement-Supp_Table_S1.pdf [file NIHMS330327-supplement-Supp_Table_S1.pdf]

Supporting Information for

## **Frequencies of *SLC44A2* alleles encoding human neutrophil antigen-3 (HNA-3) variants in the African American population**

Michael J. Huvar<sup>\*</sup>, Pirmin Schmid<sup>\*</sup>, David F. Stroncek, and Willy A. Flegel<sup>†</sup>

<sup>\*</sup> Both authors contributed equally to this study.

<sup>†</sup> To whom correspondence should be addressed. E-mail: bill.flegel@nih.gov

**This PDF file includes:**

Table S1

**Table S1.** Distribution of A:B ratios\*

| Genotype         |                  | A:B ratio† |         |                      |         |     |
|------------------|------------------|------------|---------|----------------------|---------|-----|
| Allele 1         | Allele 2         | Median     | Minimum | Inter-quartile Range | Maximum | n   |
| <i>SLC44A2*1</i> | <i>SLC44A2*1</i> | 2901       | 51      | 1173 to 7744         | 100,932 | 756 |
| <i>SLC44A2*1</i> | <i>SLC44A2*2</i> | 1.8        | 0.4     | 1.2 to 2.9           | 23.9    | 156 |
| <i>SLC44A2*2</i> | <i>SLC44A2*2</i> | 0.005      | 0.0005  | 0.002 to 0.02        | 0.099   | 50  |
| Total            |                  |            |         |                      |         | 962 |

\* This table includes ratios of the 334 samples and 39 repeat samples for this study, 46 control samples, and 62 additional samples that were not part of the study; all samples were run in duplicates.

† The ratio was calculated as described in Materials and Methods.
